# Supplementary material for: P113 is a merozoite surface protein that binds the N terminus of Plasmodium falciparum RH5
Source: PubMed Central journal article supplement (PMC5309799; doi:10.1038/ncomms14333), 2017-02-10
Supplement: ncomms14333-s1.pdf [file ncomms14333-s1.pdf]

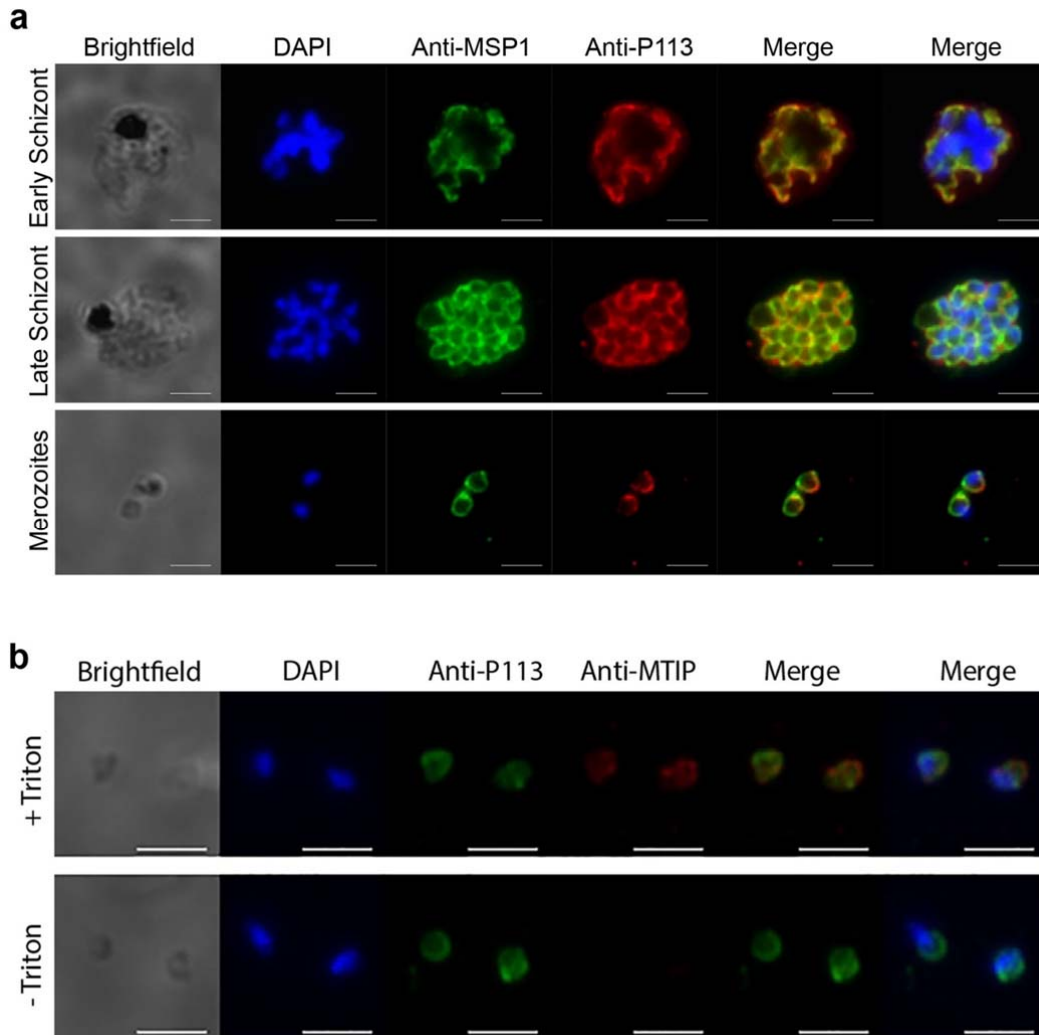

1

2 **Supplementary Figure 1. P113 is expressed in both early and late-stage *P. falciparum* schizonts and on the**  
 3 **merozoite surface.** Fixed blood stage *P. falciparum* schizonts and free merozoites were co-stained with  
 4 antibodies raised to P113 and the merozoite surface marker anti-MSP1 (**a**), or an inner membrane complex  
 5 marker, MTIP (**b**) as indicated. In (**b**), fixed merozoites were stained either with (+) or without (-) a membrane  
 6 permeabilisation step using the non-ionic detergent Triton X-100. Antibodies to P113 - but not the inner  
 7 membrane marker MTIP - stained both Triton X-100 treated and untreated samples demonstrating that P113 is  
 8 located on the surface of the merozoite. P113 staining often - although not always - exhibited an asymmetric  
 9 distribution on the merozoite surface. Nucleic acid is stained with DAPI and scale bars represent 3µm.

10

11

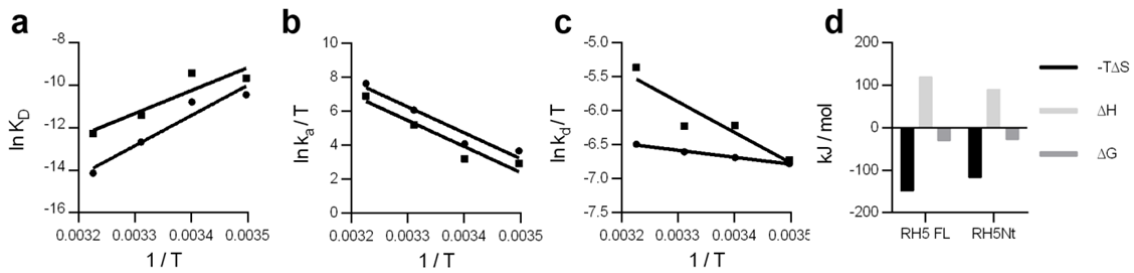

12

13

14 **Supplementary Figure 2. Thermodynamic surface plasmon resonance analysis of P113 interaction with**  
 15 **RH5 FL and RH5Nt.** P113 Y1-N653 was injected over immobilised RH5FL (500 RU) and RH5Nt (240 RU)  
 16 (150RU of Cd4 control was immobilised in the reference flow cell) at different temperatures (13-37°C) and  
 17 concentrations (2 fold serial dilution of 2 to 0.0625 $\mu$ M). Kinetic association and dissociation values were  
 18 calculated. From these were plotted a van't Hoff plot (a) and Eyring plots (b and c) from which the entropy,  
 19 enthalpy and free energy components of the interactions could be calculated (d). Circles represent RH5FL and  
 20 squares RH5Nt.

21

22

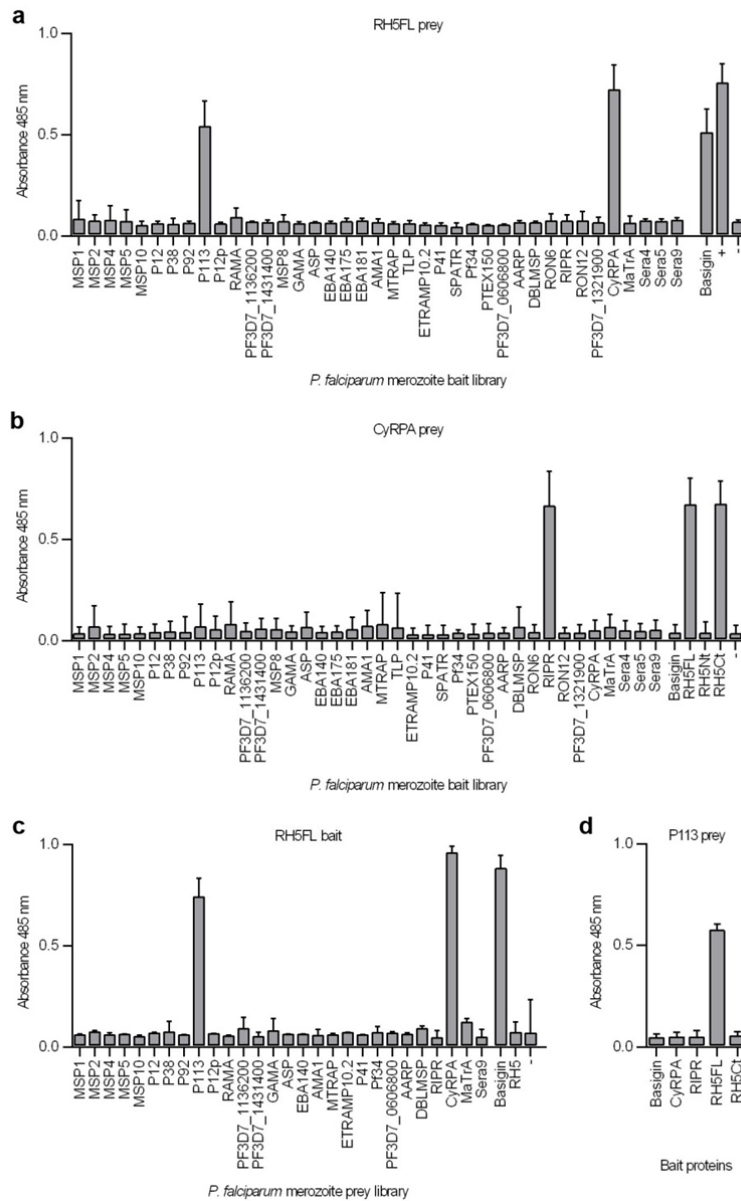

23

24 **Supplementary Figure 3. Systematic screening for direct interactions between *Plasmodium falciparum***  
 25 **merozoite proteins within the RH5 complex using AVEXIS.** The indicated *P. falciparum* merozoite proteins  
 26 were expressed as either pentameric,  $\beta$ -lactamase-tagged preys or monomeric biotinylated baits and  
 27 systematically tested for direct interactions using the AVEXIS assay. **(a)** RH5FL interacts with P113 and  
 28 CyRPA. **(b)** CyRPA interacts with RIPR, RH5FL and RH5Ct. **(c)** RH5FL bait was screened against a merozoite  
 29 protein library presented as preys. Direct interactions with P113, CyRPA and basigin were observed. **(d)** P113  
 30 prey did not interact with CyRPA, RIPR or basigin. Bars represent means  $\pm$  95% confidence intervals;  $n = 3$ , a  
 31 representative of at least two independent experiments is shown; where indicated, controls were the rat Cd200R  
 32 prey presented to Cd200 bait (+ve) or Cd4d3+4 tag alone (-ve).

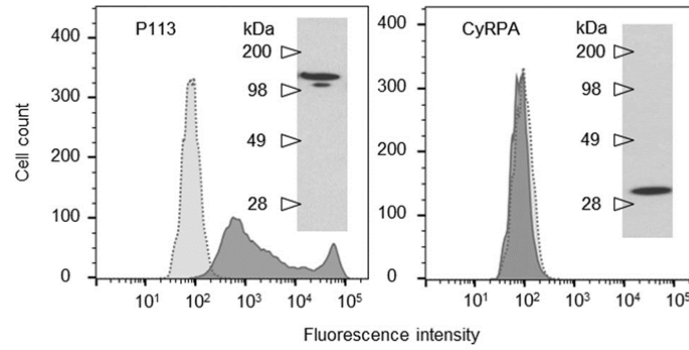

33

34 **Supplementary Figure 4. P113, but not CyRPA, is tethered to the plasma membrane when ectopically**  
35 **expressed in HEK293 cells.** The entire endogenous sequences for P113 and CyRPA (including signal peptides  
36 and predicted GPI-signal sequences) were expressed for 24h in HEK293 cells and cell surface expression was  
37 assessed by staining unfixed and unpermeabilized cells with anti-P113 or anti-CyRPA antibodies respectively.  
38 Histograms show cells transfected with P113 (left panel) or CyRPA (right panel) and stained with the  
39 corresponding antibody (dark gray) relative to negative control mock transfections (light gray). Insets show  
40 Western blots of culture supernatants 48h after transfection. Both P113 and CyRPA were detected at their  
41 expected masses.

42

43

44

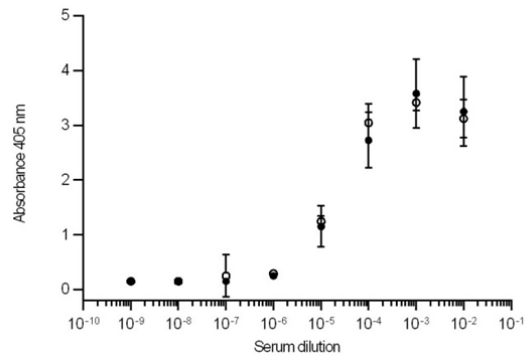

45

46 **Supplementary Figure 5. An amph-vaccine made from a chemically synthesized peptide based on RH5Nt**  
47 **elicited good antibody titres.** The antibody responses in sera from two rabbits (open and closed circles)  
48 immunised with the amph-vaccine based on RH5Nt were quantified by ELISA against recombinant,  
49 biotinylated RH5Nt immobilised on a streptavidin-coated microtitre plate. Data points present means  $\pm$  95%  
50 confidence intervals;  $n = 3$ .

51

52

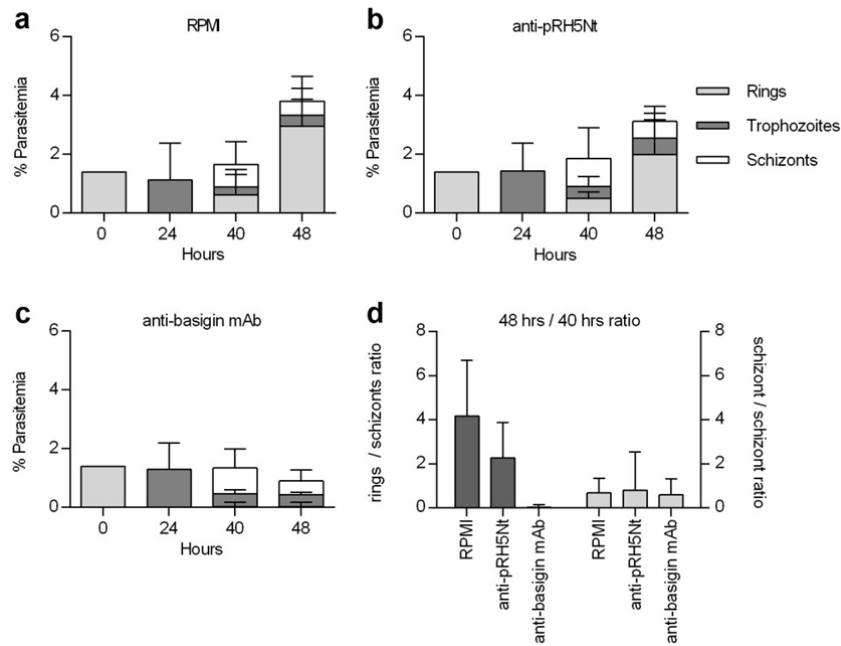

53

54 **Supplementary Figure 6. Anti-RH5Nt antibodies inhibit parasite growth by preventing invasion.** A time  
 55 course of blood stage development was performed in the presence of polyclonal antibodies against RH5Nt  
 56 (pRH5Nt), media alone or an anti-basigin mAb. Smears were made at intervals over 48 hrs from blood stage  
 57 cultures of *P. falciparum* 3D7 in RPMI alone (a), with polyclonal antibodies against pRH5Nt in RPMI at 4  
 58 mg/ml (b) or basigin monoclonal antibodies in RPMI at 10  $\mu$ g/ml (c). The number of rings, trophozoites and  
 59 schizonts at each time point (0, 24, 40 and 48 hours) were counted after being smeared, fixed and stained with  
 60 Giemsa and 2000 erythrocytes were examined by light microscopy. (d) The ratio of rings at 48 hrs to schizonts  
 61 at 40 hrs is shown in dark grey and the ratio of schizonts at 48 and 40 hrs is shown in light grey. The bars  
 62 represent means ( $n = 3$ ) and errors bars 95% confidence intervals.

63

64  
65  
66

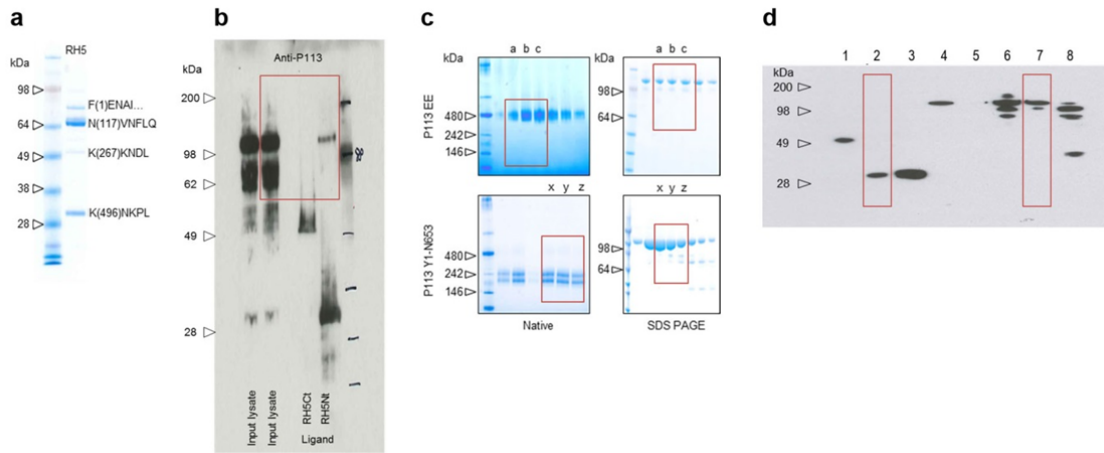

67  
68

69 **Supplementary Figure 7. Uncropped gels and blots used to produce figures.** Figure showing images of  
70 uncropped gels used in figures: (a) Fig. 1a. (b) Fig. 2c. (c) Fig. 4e. (d) and Supplementary Fig. 4; red boxes  
71 indicate the approximate cropped regions used to produce the figures. In (b), the bands detected with the anti-  
72 P113 antiserum at ~50kDa and ~30kDa correspond to the RH5Ct and RH5Nt proteins leached from the  
73 streptavidin-coated beads during the elution step of the biochemical purifications. These proteins are detected  
74 with the anti-P113 antiserum because the P113 protein used as the immunogen and the RH5Ct and RH5Nt  
75 proteins immobilised on the beads all contain a common protein tag: rat Cd4 domains 3 and 4. In (d), the  
76 different lanes represent supernatants from transfected cells detected by Western blotting using pooled  
77 antibodies to CyRPA and P113: (1) CyRPA-Cd4 recombinant protein at 48 hrs (positive control); untagged  
78 (endogenous sequence) of CyRPA at 48 hrs or 6 days (lanes (2) and (3) respectively); P113-Cd4 recombinant  
79 protein (positive control) at 24 hrs or 48 hrs (lanes (4) and (6) respectively); untagged (endogenous sequence) of  
80 P113 at 24 hrs, 48 hrs and 6 days (lanes (5), (7) and (8), respectively).

81  
82

83

| Exp. No. | Analyte      | Ligand          | $k_a$ ( $10^5 \text{ M}^{-1} \text{ s}^{-1}$ ) | $k_d$ ( $\text{s}^{-1}$ ) | $K_{D \text{ calc.}}$ ( $\mu\text{M}$ ) | $t_{1/2}$ (s) |
|----------|--------------|-----------------|------------------------------------------------|---------------------------|-----------------------------------------|---------------|
| 1        | RH5Ct        | basigin         | 3.42 $\pm$ 0.01                                | 0.2926 $\pm$ 0.0002       | 0.9                                     | 2.5           |
| 2        | RH5FL        | basigin         | 1.82 $\pm$ 0.02                                | 0.244 $\pm$ 0.001         | 1.3                                     | 2.8           |
| 3        | RH5Nt        | P113            | 3.0 $\pm$ 0.1                                  | 0.793 $\pm$ 0.009         | 2.7                                     | 0.9           |
| 4        | RH5FL        | P113            | 7.8 $\pm$ 0.2                                  | 0.231 $\pm$ 0.003         | 0.3                                     | 3.2           |
| 5        | RH5FL        | P113 Y1-N653    | 7.53 $\pm$ 0.04                                | 0.412 $\pm$ 0.002         | 0.5                                     | 1.9           |
| 6        | RH5FL        | P113 Y1-K197    | 2.84 $\pm$ 0.05                                | 0.307 $\pm$ 0.002         | 1.1                                     | 2.3           |
| 7        | P113 Y1-N653 | RH5Nt           | 3.04 $\pm$ 0.09                                | 1.54 $\pm$ 0.03           | 5.0                                     | 0.5           |
| 8        | P113 Y1-N653 | Synthetic RH5Nt | 2.16 $\pm$ 0.06                                | 1.24 $\pm$ 0.01           | 5.7                                     | 0.6           |

84

85

86 **Supplementary Table 1: A table summarising the biophysical binding parameters for RH5 interactions**  
87 **measured using surface plasmon resonance in this study.** All values were determined by fitting the whole  
88 binding data (association and dissociation phases) to a simple (1:1) binding model using gel filtrated monomeric  
89 proteins as analytes, and biotinylated monomeric ligands immobilised on a streptavidin-coated sensor chip.  
90 Values for association ( $k_a$ ) and dissociation ( $k_d$ ) rate constants are means  $\pm$  SE taken from a representative  
91 experiment. All experiments were performed at least twice using independent protein preparations except  
92 experiments 6 and 8 which were performed once; at least six serial dilutions of the analyte were used in every  
93 experiment.  $K_{D \text{ calc.}}$  was calculated from the association and dissociation rate constants ( $K_{D \text{ calc.}} = k_d/k_a$ ) and  
94 provides an independent measure of the  $K_D$  determined from equilibrium binding analysis; interaction half-lives  
95 ( $t_{1/2}$ ) =  $\ln 2/k_d$ .

96
